# Supplementary figures and images for: Synthesis and characterization of chitosan-polyvinyl alcohol-bioactive glass hybrid membranes
Source: PubMed Central journal article supplement — Biomatter. 2011 Jul 1;1(1):114–9. doi: 10.4161/biom.1.1.17449 (PMC3548251; doi:10.4161/biom.1.1.17449), 2011-07-01

## Supplementary Data – Statistical Analysis

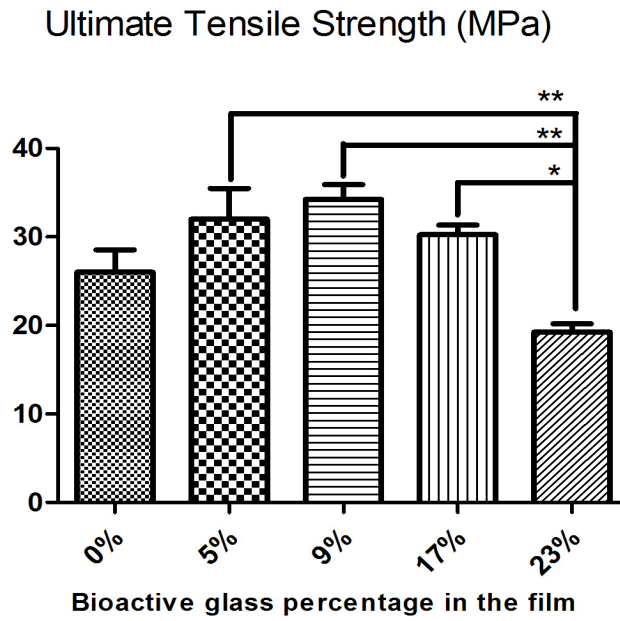

### (%) Maximum Strain

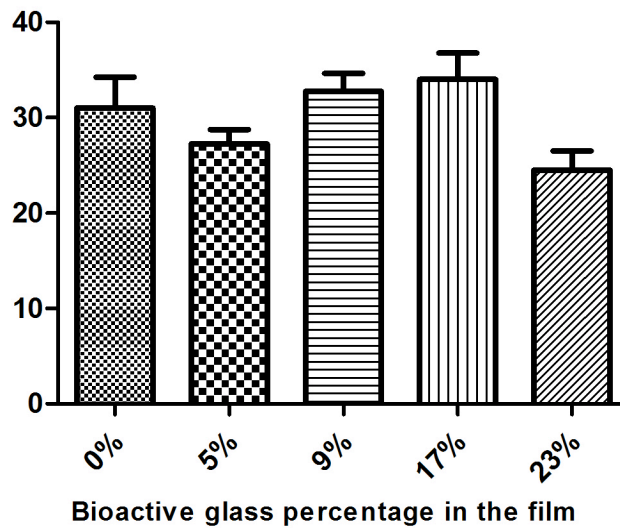

Supplement: biom-1-114-s01.pdf [file biom-1-114-s01.pdf]
